# Supplementary material for: Antioxidant Resveratrol Increases Lipolytic and Reduces Lipogenic Gene Expression under In Vitro Heat Stress Conditions in Dedifferentiated Adipocyte-Derived Progeny Cells from Dairy Cows
Source: MDPI journal article supplement (doi:10.3390/antiox10060905), 2021-06-03
Supplement: s1 [file s1]

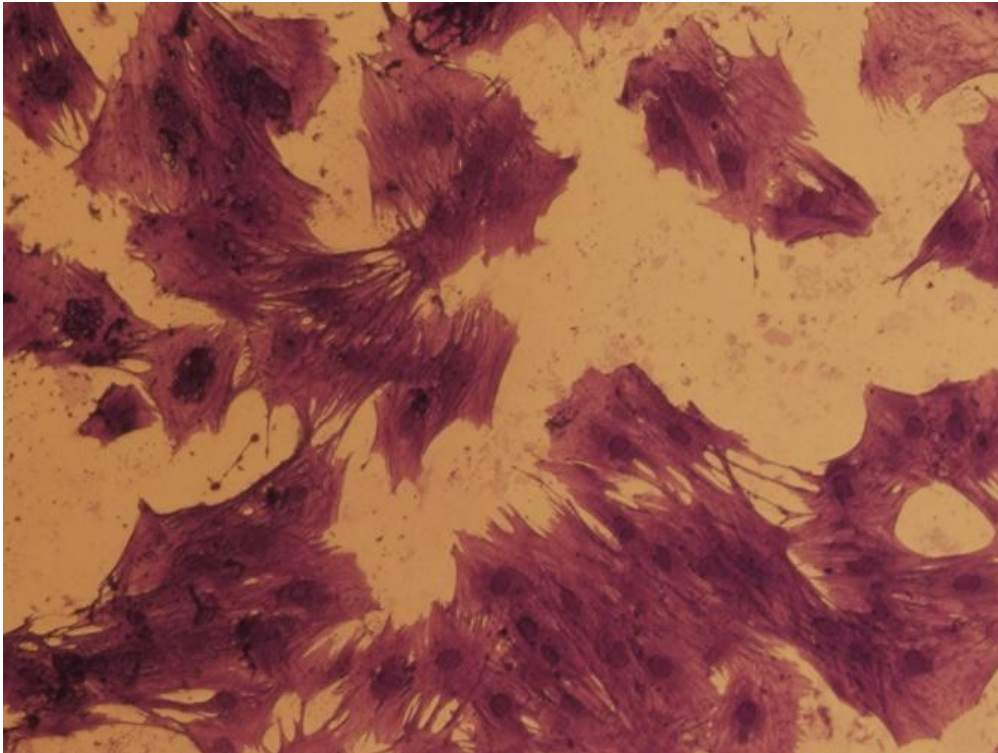

a) Control DFAT cells for at 24 hours

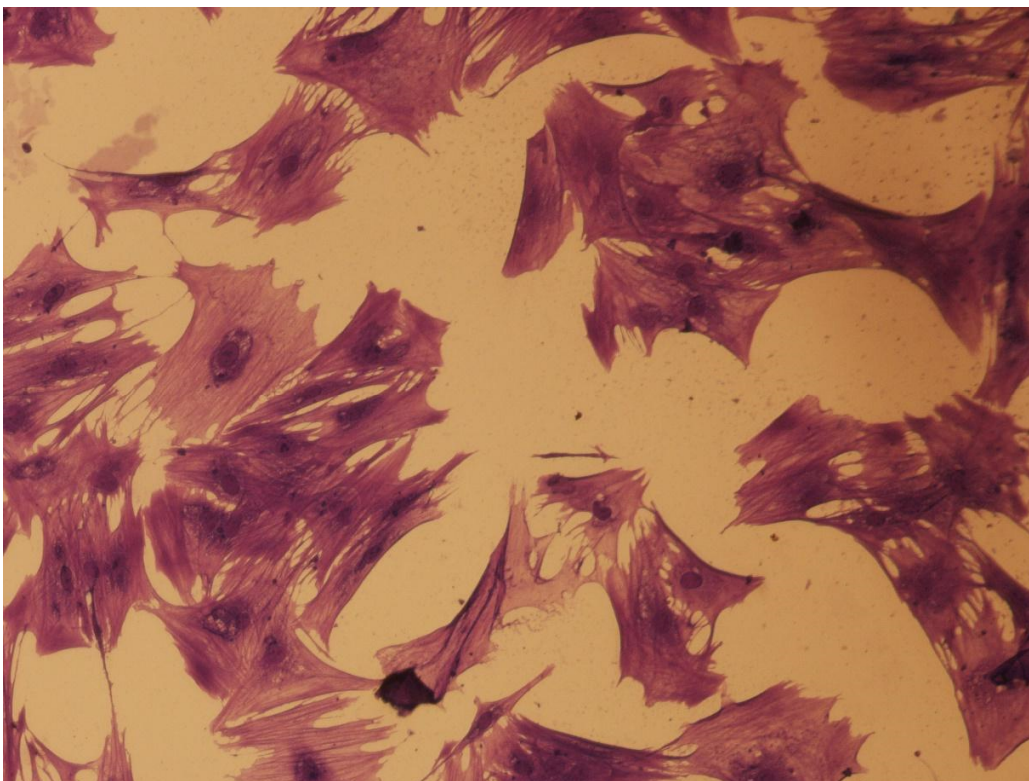

b) 100μM resveratrol treatment of DFAT cells at 24 hours

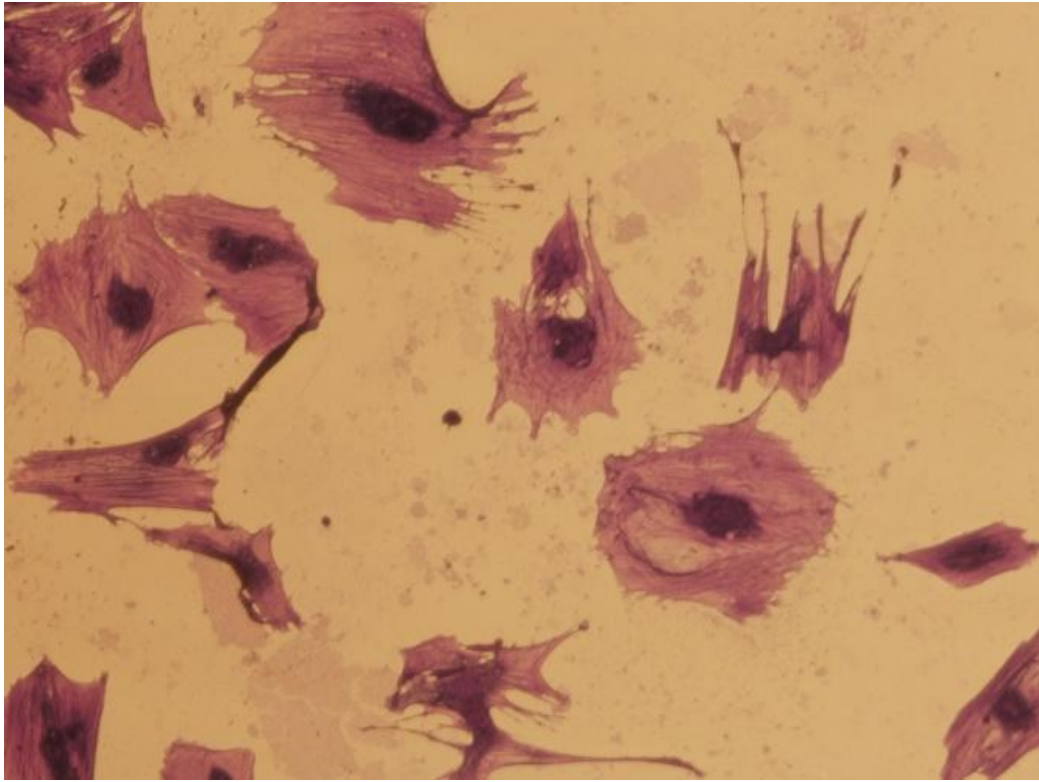

c) 200 $\mu$ M resveratrol treatment of DFAT cells at 24hours



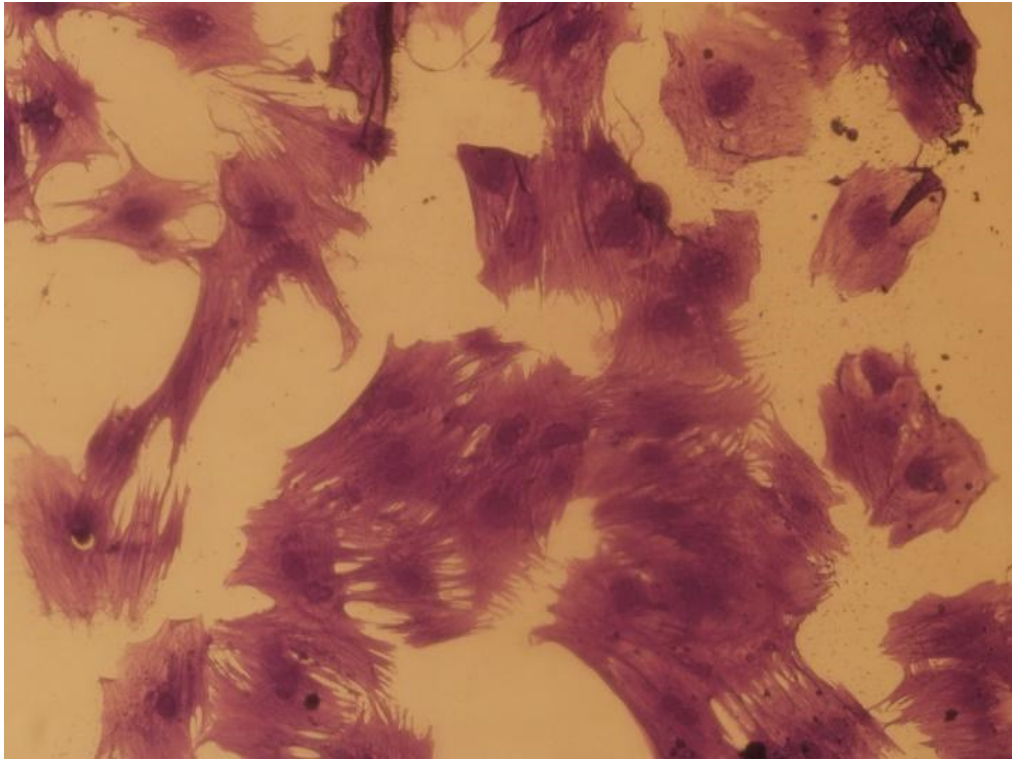

d) Control DFAT cells at 48hours

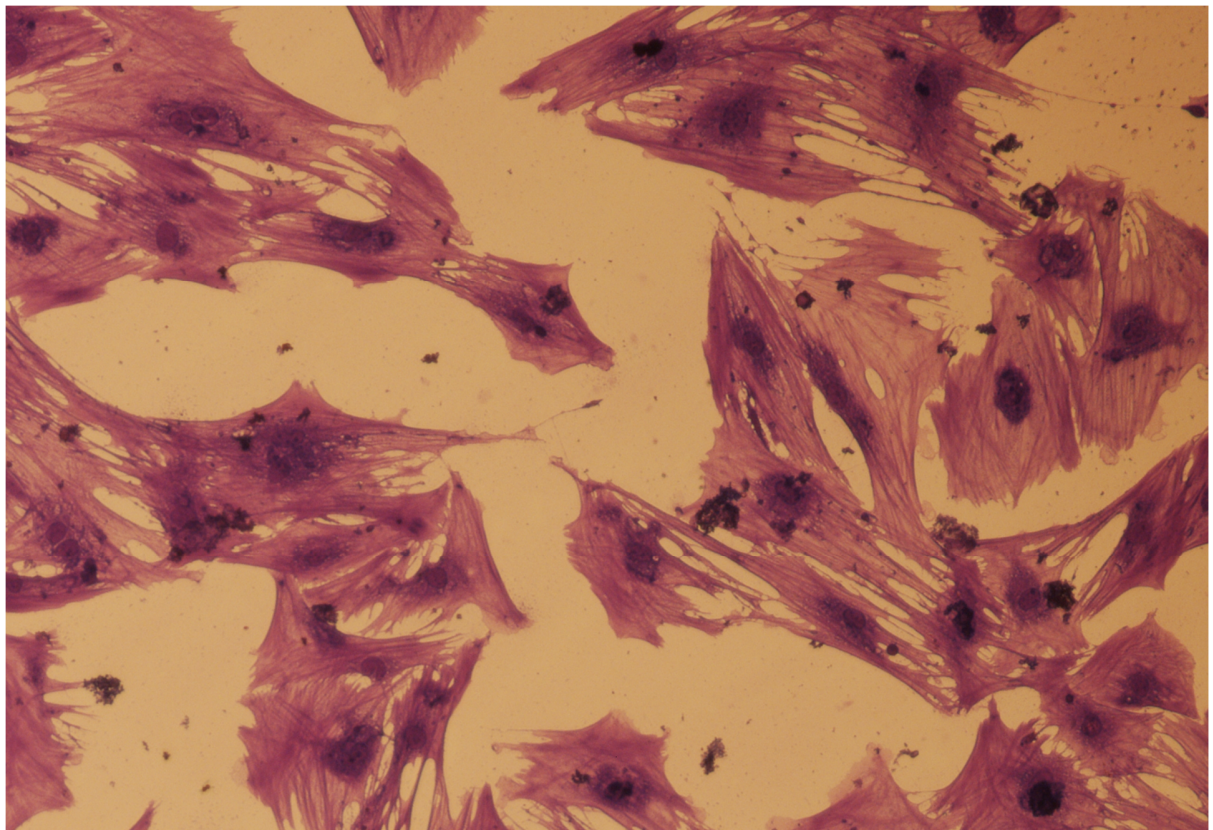

e) 100 $\mu$ M resveratrol treatment of DFAT cells at 48hours

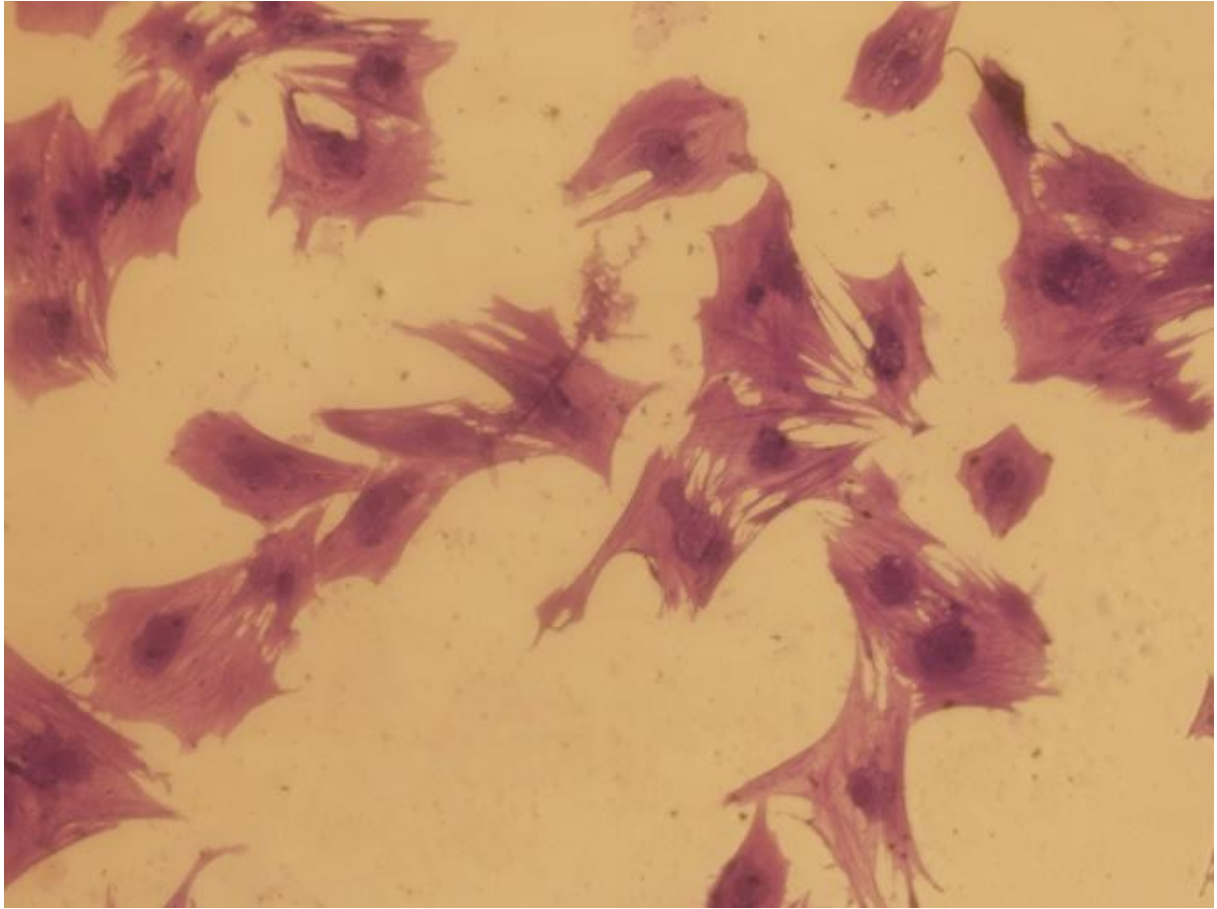

f) 200 $\mu$ M resveratrol treatment of DFAT cells at 48hours

**Supplementary Figure S1: Treatment of RSV at different concentrations of DFAT cells**



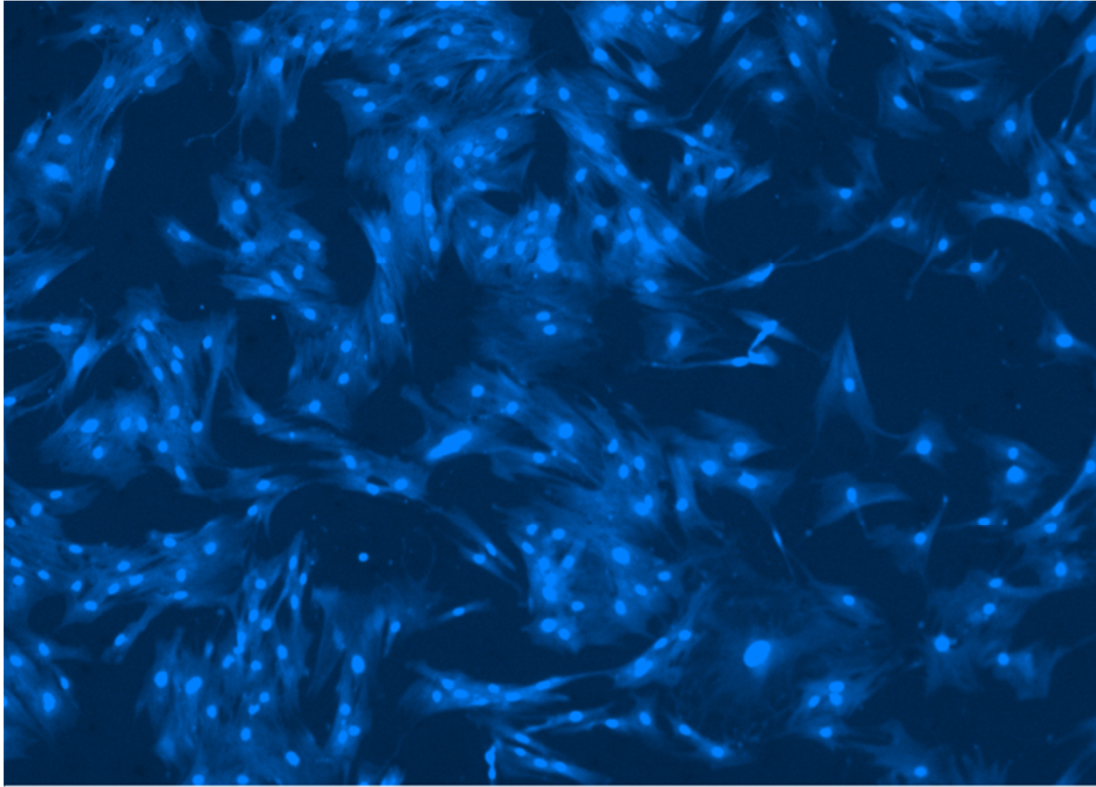

a) DAPI staining of control DFAT cells

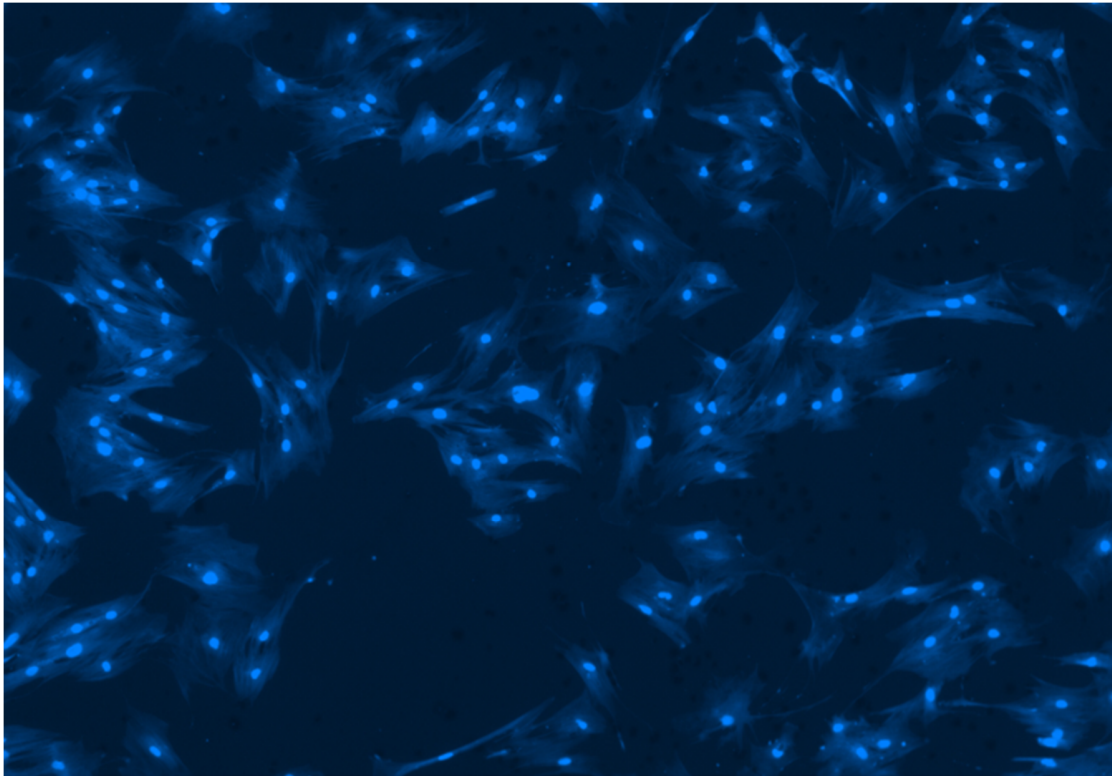

b) DAPI staining of DFAT cells treated with 100 $\mu$ M resveratrol

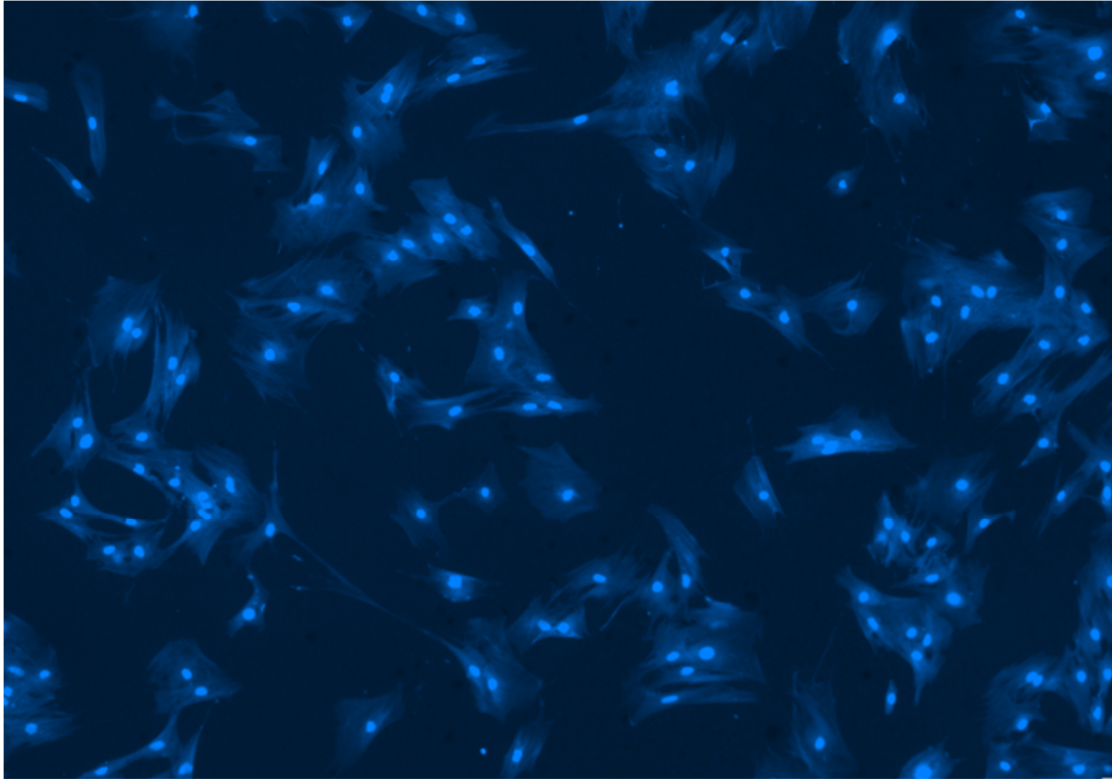

c) DAPI staining of DFAT cells treated with 200 $\mu$ M resveratrol

**Supplementary Figure S2: Cell viability of RSV treatment at 100  $\mu$ M and 200  $\mu$ M by DAPI staining**

**Supplementary Table S1:** RSV effect on the MDA and ORAC levels in DFAT cells

|             | Control       | RSV treatment |               | P-value |       |
|-------------|---------------|---------------|---------------|---------|-------|
|             |               | 100μM         | 200μM         | 100μM   | 200μM |
| <b>MDA</b>  | 54.569 ± 3.0  | 43.771 ± 2.1  | 41.944 ± 2.9  | 0.01    | 0.05  |
| <b>ORAC</b> | 151.982 ± 2.0 | 155.637 ± 1.9 | 157.210 ± 2.1 | 0.008   | 0.008 |



**Supplementary Table S2:** RSV effect on the Relative quantification (RQ) of different genes expression under short and long heat stress

| <i>Gene</i>             | Isothermal |           | Short Heat Stress |           | Long Heat Stress |            | P-value |        |          |
|-------------------------|------------|-----------|-------------------|-----------|------------------|------------|---------|--------|----------|
|                         | Control    | RSV       | Control           | RSV       | Control          | RSV        | HS      | RSV    | HS × RSV |
| <b>Oxidative stress</b> |            |           |                   |           |                  |            |         |        |          |
| <i>STIP1</i>            | 1.00±0.74  | 3.93±0.66 | 1.0±0.72          | 3.9±0.68  | 4.17±0.70        | 7.33±0.73  | 0.0001  | 0.0008 | 0.97     |
| <i>SOD1</i>             | 1.00±0.29  | 0.49±0.28 | 1.11±0.35         | 0.86±0.29 | 1.13±0.28        | 0.550±0.31 | 0.66    | 0.21   | 0.81     |
| <i>HSF1</i>             | 1.00±0.12  | 1.02±0.11 | 0.89±0.12         | 0.81±0.11 | 1.09±0.11        | 0.95±0.12  | 0.21    | 0.64   | 0.74     |
| <b>Lipid metabolism</b> |            |           |                   |           |                  |            |         |        |          |
| <i>LIPE</i>             | 1.00±0.28  | 1.78±0.27 | 0.67±0.29         | 1.51±0.27 | 0.29±0.26        | 0.86±0.29  | 0.009   | 0.02   | 0.86     |
| <i>MGLL</i>             | 1.00±0.21  | 1.34±0.20 | 0.80±0.22         | 0.80±0.20 | 0.59±0.20        | 0.62±0.21  | 0.01    | 0.60   | 0.6      |
| <i>PLIN</i>             | 1.00±0.39  | 2.44±0.37 | 0.72±0.41         | 2.2±0.39  | 0.88±0.37        | 2.1±0.41   | 0.80    | 0.002  | 0.93     |
| <i>FASN</i>             | 1.00±0.09  | 0.45±0.09 | 1.03±0.09         | 0.40±0.09 | 0.78±0.09        | 0.42±0.10  | 0.33    | 0.0001 | 0.28     |
| <b>Apoptosis</b>        |            |           |                   |           |                  |            |         |        |          |
| <i>BAD</i>              | 1.00±0.13  | 1.15±0.13 | 0.88±0.14         | 1.04±0.13 | 0.66±0.13        | 0.96±0.14  | 0.13    | 0.20   | 0.80     |
| <i>BAX</i>              | 1.00±0.18  | 2.07±0.18 | 0.72±0.19         | 1.72±0.18 | 1.11±0.18        | 1.88±0.19  | 0.1415  | 0.0001 | 0.62     |
| <i>PCNA</i>             | 1.00±0.12  | 0.44±0.11 | 0.95±0.12         | 0.25±0.11 | 0.57±0.11        | 0.06±0.12  | 0.002   | 0.0001 | 0.65     |

| <b>Inflammation</b>    |           |           |           |           |           |           |      |        |      |
|------------------------|-----------|-----------|-----------|-----------|-----------|-----------|------|--------|------|
| <i>CCL2</i>            | 1.00±0.14 | 0.36±0.14 | 0.60±0.15 | 0.12±0.14 | 0.88±0.14 | 0.14±0.15 | 0.06 | 0.0006 | 0.63 |
| <i>IL1-β</i>           | 1.00±0.53 | 1.08±0.51 | 0.72±0.55 | 0.84±0.53 | 0.90±0.51 | 1.04±0.56 | 0.85 | 0.85   | 0.99 |
| <b>SIRT1 signaling</b> |           |           |           |           |           |           |      |        |      |
| <i>SIRT1</i>           | 1.00±0.18 | 0.88±0.18 | 0.91±0.19 | 0.71±0.18 | 0.79±0.17 | 0.80±0.19 | 0.65 | 0.63   | 0.82 |
| <i>FOXO1</i>           | 1.00±0.19 | 0.98±0.18 | 0.77±0.19 | 0.77±0.18 | 0.78±0.18 | 0.83±0.19 | 0.39 | 0.95   | 0.98 |
| <i>FOXO3</i>           | 1.00±0.16 | 0.71±0.17 | 0.94±0.17 | 0.52±0.16 | 1.06±0.16 | 0.67±0.17 | 0.62 | 0.06   | 0.88 |
| <i>PPARγ</i>           | 1.00±0.28 | 1.05±0.26 | 0.87±0.29 | 0.65±0.27 | 0.70±0.26 | 0.62±0.29 | 0.34 | 0.78   | 0.85 |
